# Supplementary material for: High-efficiency removal of Cd(ii) and As(iii) from irrigation water using a S–Fe–C composite: performance and mechanisms
Source: Royal Society of Chemistry journal article supplement (doi:10.1039/d3en00863k), 2024-01-01
Supplement: d3en00863k1.pdf [file d3en00863k1.pdf]

**Supplementary material:**

**Table S1** Comparison of adsorption capacity of Cd(II) and As(III) by the adsorbents in different literature.

**Table S3** Characteristics of irrigation water sample.

**Table S3** Superficial elemental composition and atomic ratios of SFC before and after adsorption of Cd(II) or As(III) by EDS analysis.

**Table S1**

| Raw materials                                      | pH  | Adsorption capacity<br>of Cd(II) (mg·g <sup>-1</sup> ) | Adsorption capacity<br>of As(III)(mg·g <sup>-1</sup> ) | References |
|----------------------------------------------------|-----|--------------------------------------------------------|--------------------------------------------------------|------------|
| Zeolite-nZVI                                       | 7.0 | 48.63                                                  | 11.52                                                  | 1          |
| GB-nZVI                                            | 7.0 | 46.4                                                   | 181.5                                                  | 2          |
| S-nZVI                                             | 7.0 | 11.37                                                  | 230.29                                                 | 3          |
| biochar supported<br>S-nZVI                        | 5.0 | 162                                                    | 276                                                    | 4          |
| $\alpha$ -FeOOH<br>modified wheat<br>straw biochar | 4.0 | 62.9                                                   | 78.3                                                   | 5          |
| Biochar-supported<br>nZVI                          | 4.0 | 67.9                                                   | 291                                                    | 6          |
| calcium-based<br>magnetic biochar                  | 6.0 | 10.07                                                  | 6.37                                                   | 7          |
| S-Fe-C<br>composites                               | 4.0 | 405                                                    | 349                                                    | This study |

**References**

- 1 Z. Li, L. Wang, J. Meng, X. Liu, J. Xu, F. Wang and P. Brookes, Zeolite-supported nanoscale zero-valent iron: New findings on simultaneous adsorption of Cd(II), Pb(II), and As(III) in aqueous solution and soil, *Journal of Hazardous Materials*, 2018, **344**, 1–11.
- 2 K. Liu, F. Li, J. Cui, S. Yang and L. Fang, Simultaneous removal of Cd(II) and As(III) by graphene-like biochar-supported zero-valent iron from irrigation waters under aerobic conditions: Synergistic effects and mechanisms, *Journal of Hazardous Materials*, 2020, **395**, 122623.
- 3 M. Ainiwaer, T. Zhang, N. Zhang, X. Yin, S. Su, Y. Wang, Y. Zhang and X. Zeng, Synergistic removal of As(III) and Cd(II) by sepiolite-modified nanoscale zero-valent iron and a related mechanistic study, *Journal of Environmental Management*, 2022, **319**, 115658.
- 4 X. Zheng, Q. Wu, C. Huang, P. Wang, H. Cheng, C. Sun, J. Zhu, H. Xu, K. Ouyang, J. Guo and Z. Liu, Synergistic effect and mechanism of Cd(II) and As(III) adsorption by biochar supported sulfide nanoscale zero-valent iron, *Environmental Research*, 2023, **231**, 116080.
- 5 S. Zhu, T. Qu, M. K. Irshad and J. Shang, Simultaneous removal of Cd(II) and As(III) from co-

- contaminated aqueous solution by  $\alpha$ -FeOOH modified biochar, *Biochar*, 2020, **2**, 81–92.
- 6 D. Yang, L. Wang, Z. Li, X. Tang, M. He, S. Yang, X. Liu and J. Xu, Simultaneous adsorption of Cd(II) and As(III) by a novel biochar-supported nanoscale zero-valent iron in aqueous systems, *Science of The Total Environment*, 2020, **708**, 134823.
- 7 J. Wu, D. Huang, X. Liu, J. Meng, C. Tang and J. Xu, Remediation of As(III) and Cd(II) co-contamination and its mechanism in aqueous systems by a novel calcium-based magnetic biochar, *Journal of Hazardous Materials*, 2018, **348**, 10–19.

**Table S2**

| Items                                               | Value |
|-----------------------------------------------------|-------|
| pH                                                  | 6.32  |
| TOC (mg·L <sup>-1</sup> )                           | 6.05  |
| TC (mg·L <sup>-1</sup> )                            | 17.3  |
| Ca <sup>2+</sup> (mg·L <sup>-1</sup> )              | 14.9  |
| Mg <sup>2+</sup> (mg·L <sup>-1</sup> )              | 12.2  |
| K <sup>+</sup> (mg·L <sup>-1</sup> )                | 10.0  |
| Na <sup>+</sup> (mg·L <sup>-1</sup> )               | 3.93  |
| SO <sub>4</sub> <sup>2-</sup> (mg·L <sup>-1</sup> ) | 23.1  |
| NO <sub>3</sub> <sup>-</sup> (mg·L <sup>-1</sup> )  | 15.1  |
| PO <sub>4</sub> <sup>3-</sup> (mg·L <sup>-1</sup> ) | 17.1  |
| Cd(II) (mg·L <sup>-1</sup> )                        | -     |
| As(III) (mg·L <sup>-1</sup> )                       | -     |

**Table S3**

|                 | Element content of SFC(%) |      |      |      |      |      |      |      |      |
|-----------------|---------------------------|------|------|------|------|------|------|------|------|
|                 | C                         | O    | S    | Fe   | K    | Na   | Mg   | Cd   | As   |
| Before reaction | 37.4                      | 39.6 | 0.7  | 15.1 | 2.79 | 3.12 | 0.91 | -    | -    |
| Cd(II)          | 39.9                      | 23.7 | 1.6  | 24.8 | 1.23 | 1.66 | 0.07 | 7.09 | -    |
| As(III)         | 31.5                      | 44.0 | 1.51 | 17.3 | -    | -    | -    | -    | 5.72 |
